# Supplementary material for: Soil nutrient gradients drive phylogenetic clustering of arbuscular mycorrhizal fungi associated with Malva sylvestris across Moroccan drylands
Source: Research Square preprint supplement (doi:10.21203/rs.3.rs-7474160/v1), 2025-09-10

**Supplementary Information**

**Table S1.** Soil physicochemical properties across sites. Mean values and standard deviations of soil chemical properties at each study site.

| **Sites** | **Total P** | **Total C** | **Total K** | **Total N** | **C/N_Ratio** |
| --- | --- | --- | --- | --- | --- |
| Abou Jaad | 0.12 ± 0.00 | 2.05 ± 0.00 | 0.26 ± 0.00 | 0.06 ± 0.00 | 34.17 ± 0.00 |
| Ait Ali | 0.55 ± 0.05 | 1.89 ± 0.19 | 0.41 ± 0.02 | 0.18 ± 0.03 | 10.60 ± 1.70 |
| Ait Hamou | 0.07 ± 0.01 | 1.88 ± 0.21 | 0.60 ± 0.04 | 0.17 ± 0.01 | 10.81 ± 1.02 |
| Benguerir | 0.09 ± 0.00 | 1.71 ± 0.03 | 0.48 ± 0.00 | 0.18 ± 0.00 | 9.50 ± 0.15 |
| Berrechid | 0.31 ± 0.00 | 2.17 ± 0.08 | 0.40 ± 0.00 | 0.16 ± 0.00 | 13.58 ± 0.52 |
| Bouskoura | 0.15 ± 0.02 | 1.81 ± 0.01 | 0.15 ± 0.00 | 0.14 ± 0.02 | 13.47 ± 1.36 |
| Nkhaila | 0.06 ± 0.00 | 2.50 ± 0.46 | 0.26 ± 0.00 | 0.20 ± 0.00 | 12.53 ± 2.29 |
| Oued Laabid | 0.20 ± 0.00 | 3.43 ± 0.85 | 0.21 ± 0.00 | 0.20 ± 0.00 | 17.13 ± 4.27 |
| Ouled Ayad | 0.35 ± 0.00 | 2.46 ± 0.00 | 0.34 ± 0.00 | 0.48 ± 0.00 | 5.13 ± 0.00 |
| Settat | 0.46 ± 0.14 | 2.60 ± 0.43 | 0.73 ± 0.23 | 0.29 ± 0.02 | 8.88 ± 1.30 |
| Sidi Bettache | 0.07 ± 0.02 | 1.37 ± 0.72 | 0.11 ± 0.06 | 0.12 ± 0.06 | 11.15 ± 1.82 |
| Tassaout | 0.07 ± 0.00 | 2.20 ± 0.00 | 0.26 ± 0.00 | 0.23 ± 0.00 | 9.57 ± 0.00 |
| Zhiliga | 0.10 ± 0.00 | 2.08 ± 0.00 | 0.16 ± 0.00 | 0.25 ± 0.00 | 8.32 ± 0.00 |

**Table S2.** Analysis of variance of *Malva sylvestris* root mycorrhization across sites and soil chemical properties. Numbers in bold indicate significant values (*p* < 0.05).

| Variables | Df | Sum Sq | Mean Sq | F value | Pr(>F) |
| --- | --- | --- | --- | --- | --- |
| Sites | 10 | 9599.5 | 959.95 | 2.9229 | **0.01616** |
| TotalC | 1 | 920.6 | 920.62 | 2.8032 | 0.10762 |
| TotalN | 1 | 540.8 | 540.75 | 1.6465 | 0.21221 |
| TotalP | 1 | 2470.6 | 2470.62 | 7.5227 | **0.01159** |
| TotalK | 1 | 39.6 | 39.62 | 0.1207 | 0.73149 |
| C_N_Ratio | 1 | 1025.7 | 1025.73 | 3.1232 | 0.09045 |
| Residuals | 23 | 7553.7 | 328.42 |  |  |

**Table S3.** Analysis of variance of Malva sylvestris root mycorrhization in relation to precipitation, mean annual temperature, and distance to the coast. Number in bold indicates significant values (*p* < 0.05).

| Variables | Df | Sum Sq | Mean Sq | F value | Pr(>F) |
| --- | --- | --- | --- | --- | --- |
| AP | 1 | 2598.4 | 2598.43 | 5.1922 | **0.0289** |
| distance_to_coast_km | 1 | 791.7 | 791.69 | 1.582 | 0.2168 |
| MAT | 1 | 1244.7 | 1244.68 | 2.4871 | 0.1238 |
| Residuals | 35 | 17515.7 | 500.45 |  |  |

**Figure S1**. Map of the 13 sampled sites in Morocco. The scale bar represents 100 km (map generated using Google Earth).


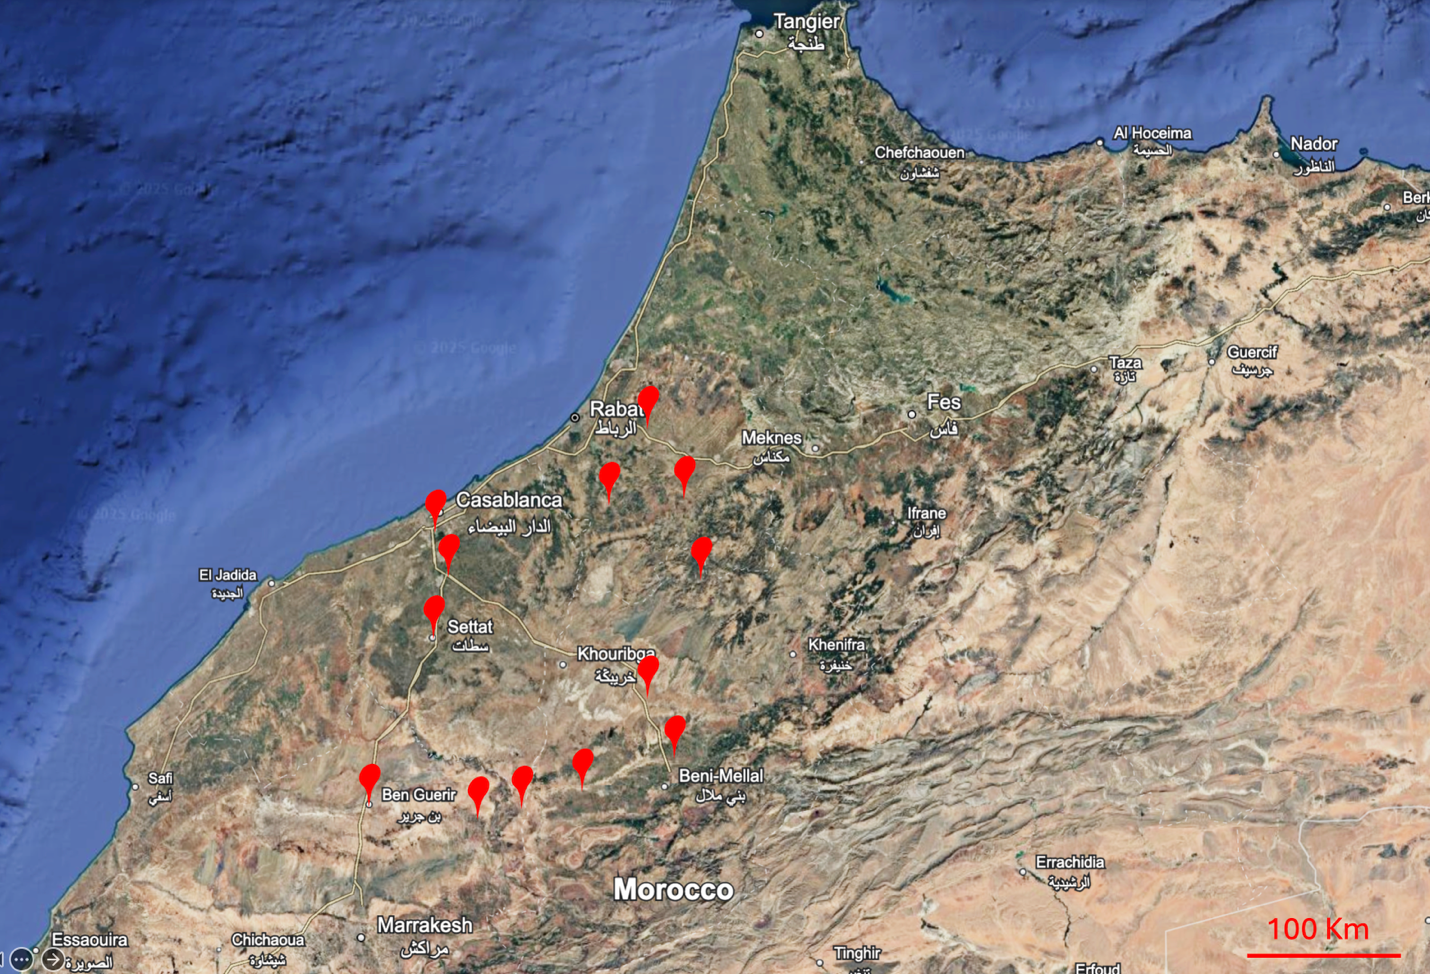


**Figure S2**. Rarefaction curves for AMF communities showing that sequencing depth was sufficient to reach saturation across all samples.


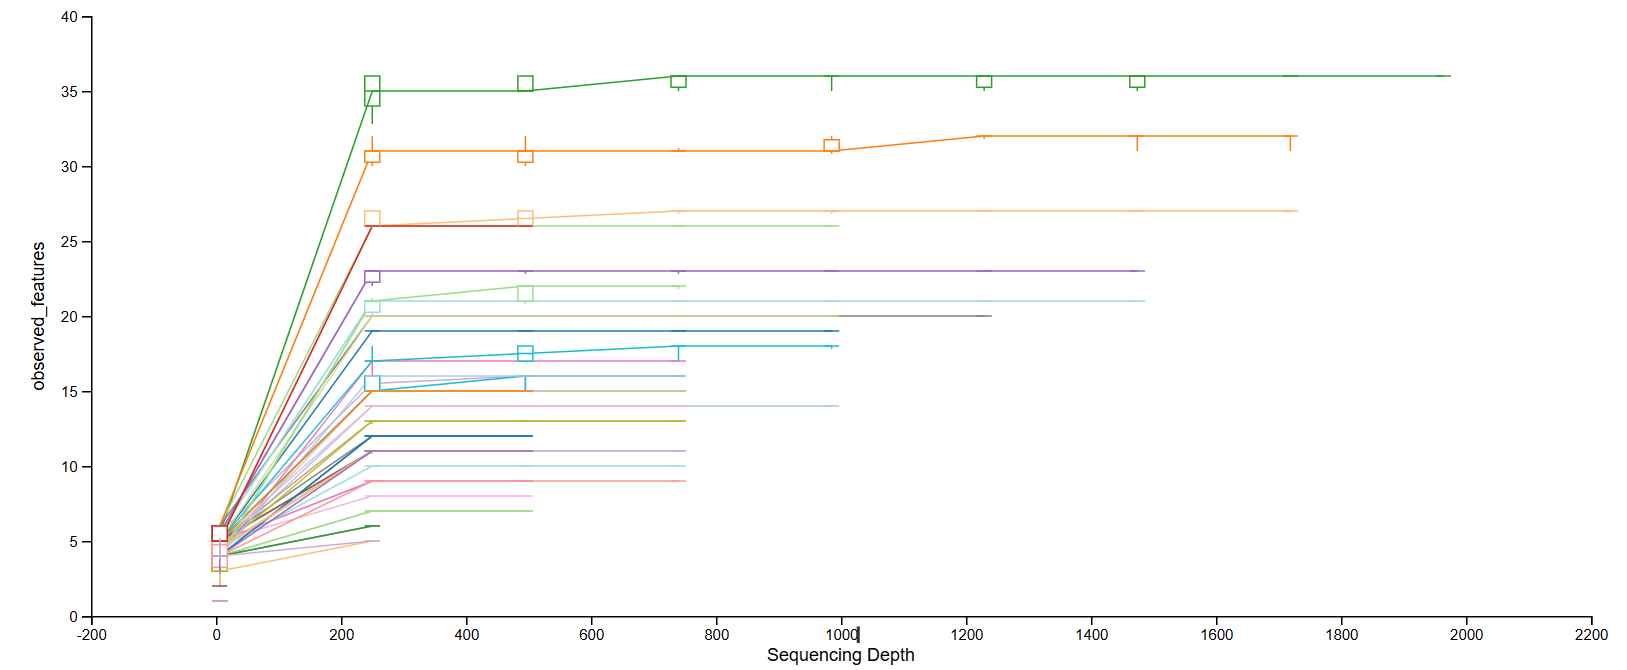


**Figure S3**. Spearman’s correlation between soil nutrients, precipitation, and distance from the coastline.


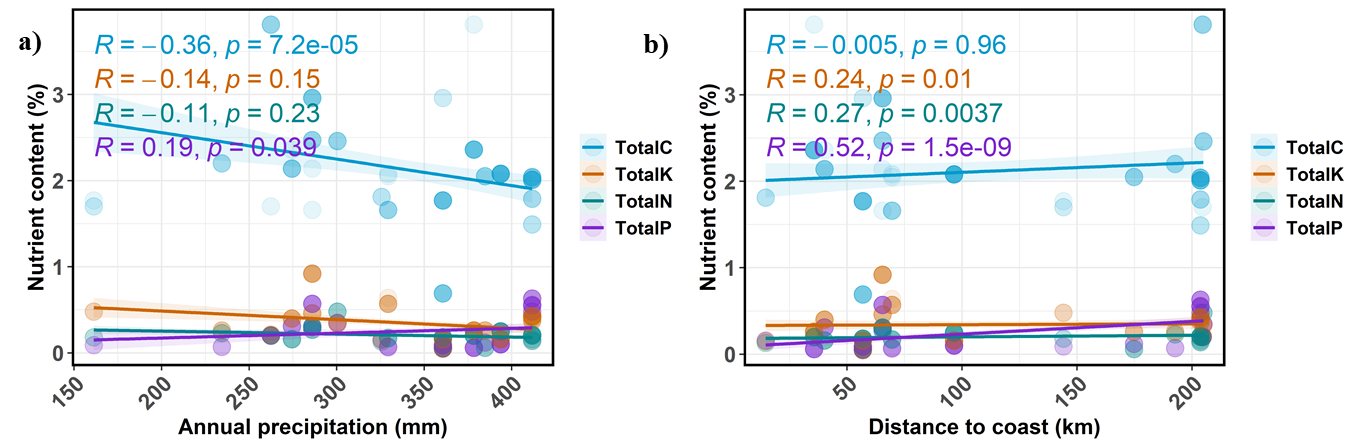


**Figure S4**. Species Diversity of AMF in Moroccan dryland ecosystems. Presence and absence data of AMF species in various sites a) in rhizosphere b) roots across sites.

**
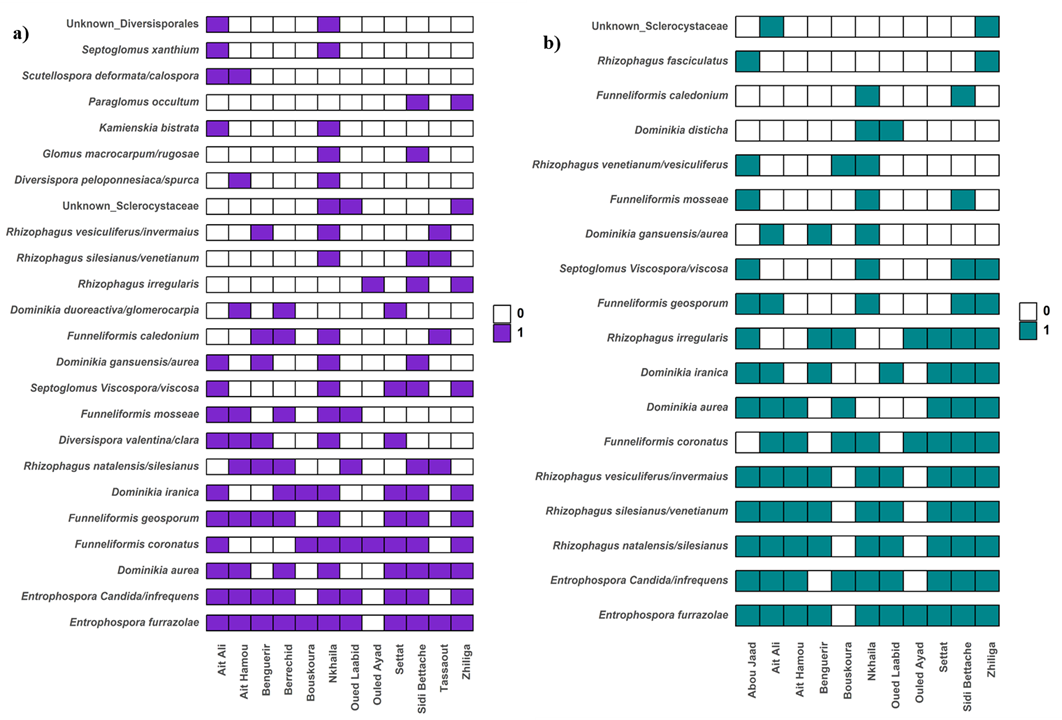
**

**Figure S5**. Relative abundance of key AMF genera colonizing Malva roots along soil nutrients and Precipitation gradients. Generalized additive model of a) *Entrosphospora*, *Rhizophagus* and Unclassified Glomeromycoata along precipitation gradient; b. *Dominikia*, *Entrophospora* *Rhizophagus* and Unclassified Glomeromycota versus Total soil P c. *Entrophospora* and *Rhizophagus* versus Total N.


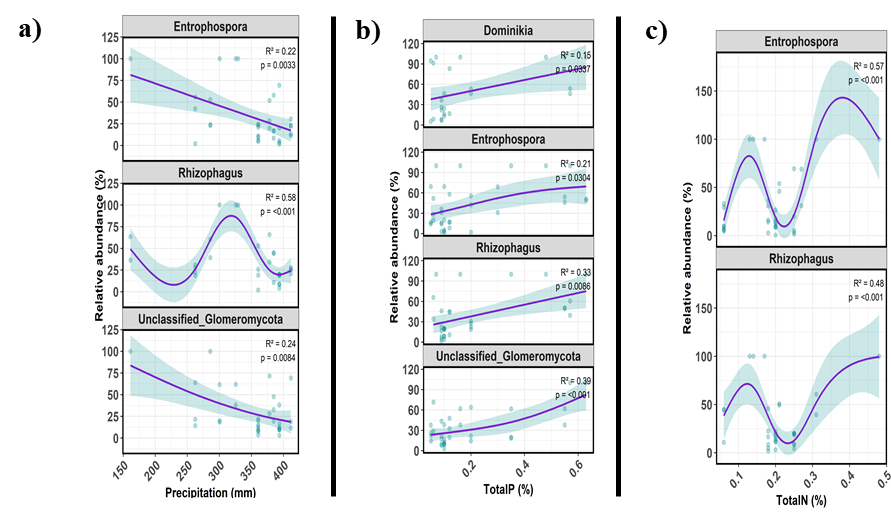


**Figure S6**. Community assembly processes in the rhizosphere. (a) Predictors of βNTI in the rhizosphere. (b) Mantel test of βNTI versus precipitation.


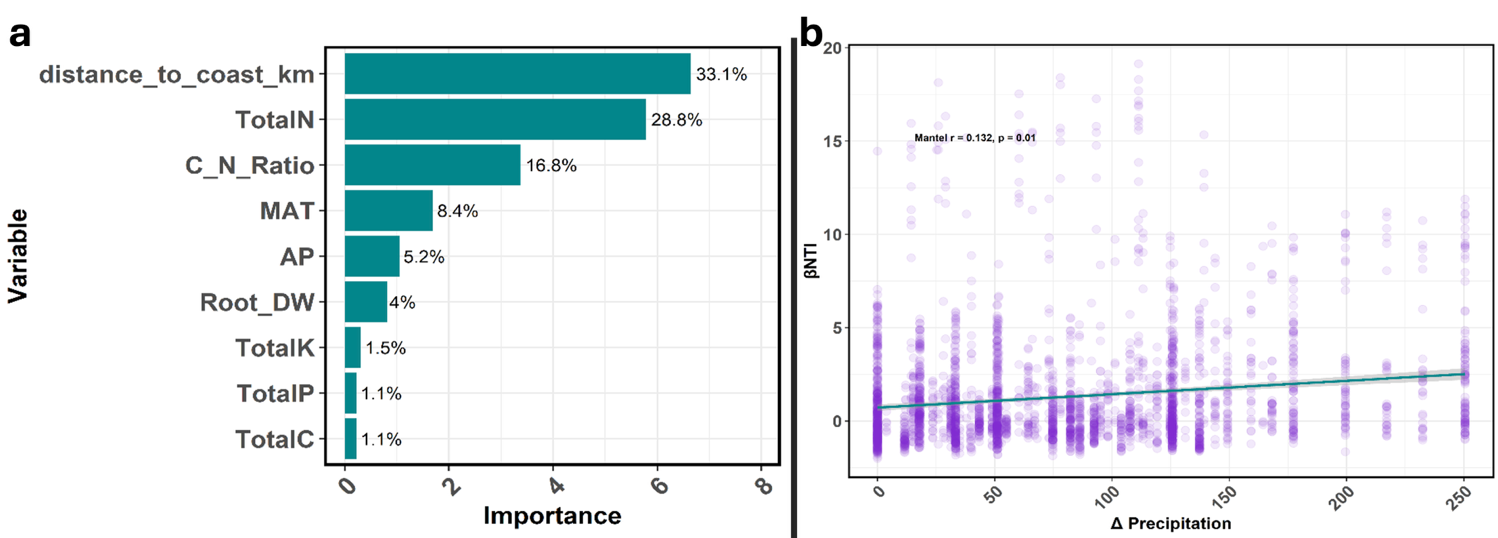

Supplement: Supplementary file 1 [file 12faf8f39f5cfec66de19d74.docx]
